# Supplementary material for: Adapting medical guidelines to be patient-centered using a patient-driven process for individuals with sickle cell disease and their caregivers
Source: BMC Hematol. 2018 Jun 8;18:12. doi: 10.1186/s12878-018-0106-3 (PMC5994026; doi:10.1186/s12878-018-0106-3)
Supplement: Supplementary file 1 — Raw data. (XLSX 8 kb) [file 12878_2018_106_MOESM1_ESM.xlsx]

## Sheet: Sheet1
Questions
Are you under 15?
Are you 15-25?
Are you over 25?
Do you have a smart phone like a Samsung, iPhone, Android?
Do you use your phone for text messaging?
Do you use email for the health of someone with SCD?
Do you use social media like Facebook, Twitter or Instagram for the health of someone with SCD?
Do you use mobile apps for your health?
Do you use apps for the health of someone with SCD?
Do you know what a medical guideline is?
Would you want to know what these guidelines are?
Would you feel you could provide better care to the family member with sickle cell if you knew what the guidelines were?
Would you want your doctor or nurse explain the content of the guidelines to you?
Would you want a paper copy of the guidelines?
Would you want to receive text messages about the guidelines (short ones daily)?
Would you want the guidelines available on your clinic's patient portal?
Would you want the guidelines to be available in social media like Facebook, Instagram, or Twitter?
Would you want guidelines in mobile app?
Would you want guidelines in app over facebook?
Facebook to communicate about guidelines and other things
Would you use these guidelines to keep track of you (or your child's) SCD
Would you use these guidelines to discuss your care with any of your doctor(s)?
